# Supplementary material
Source: Springer Nature journal article supplement (https://www.springermedizin.de/resource/supplementary/13256_2010_1505_MOESM4_ESM.pdf/9647814)

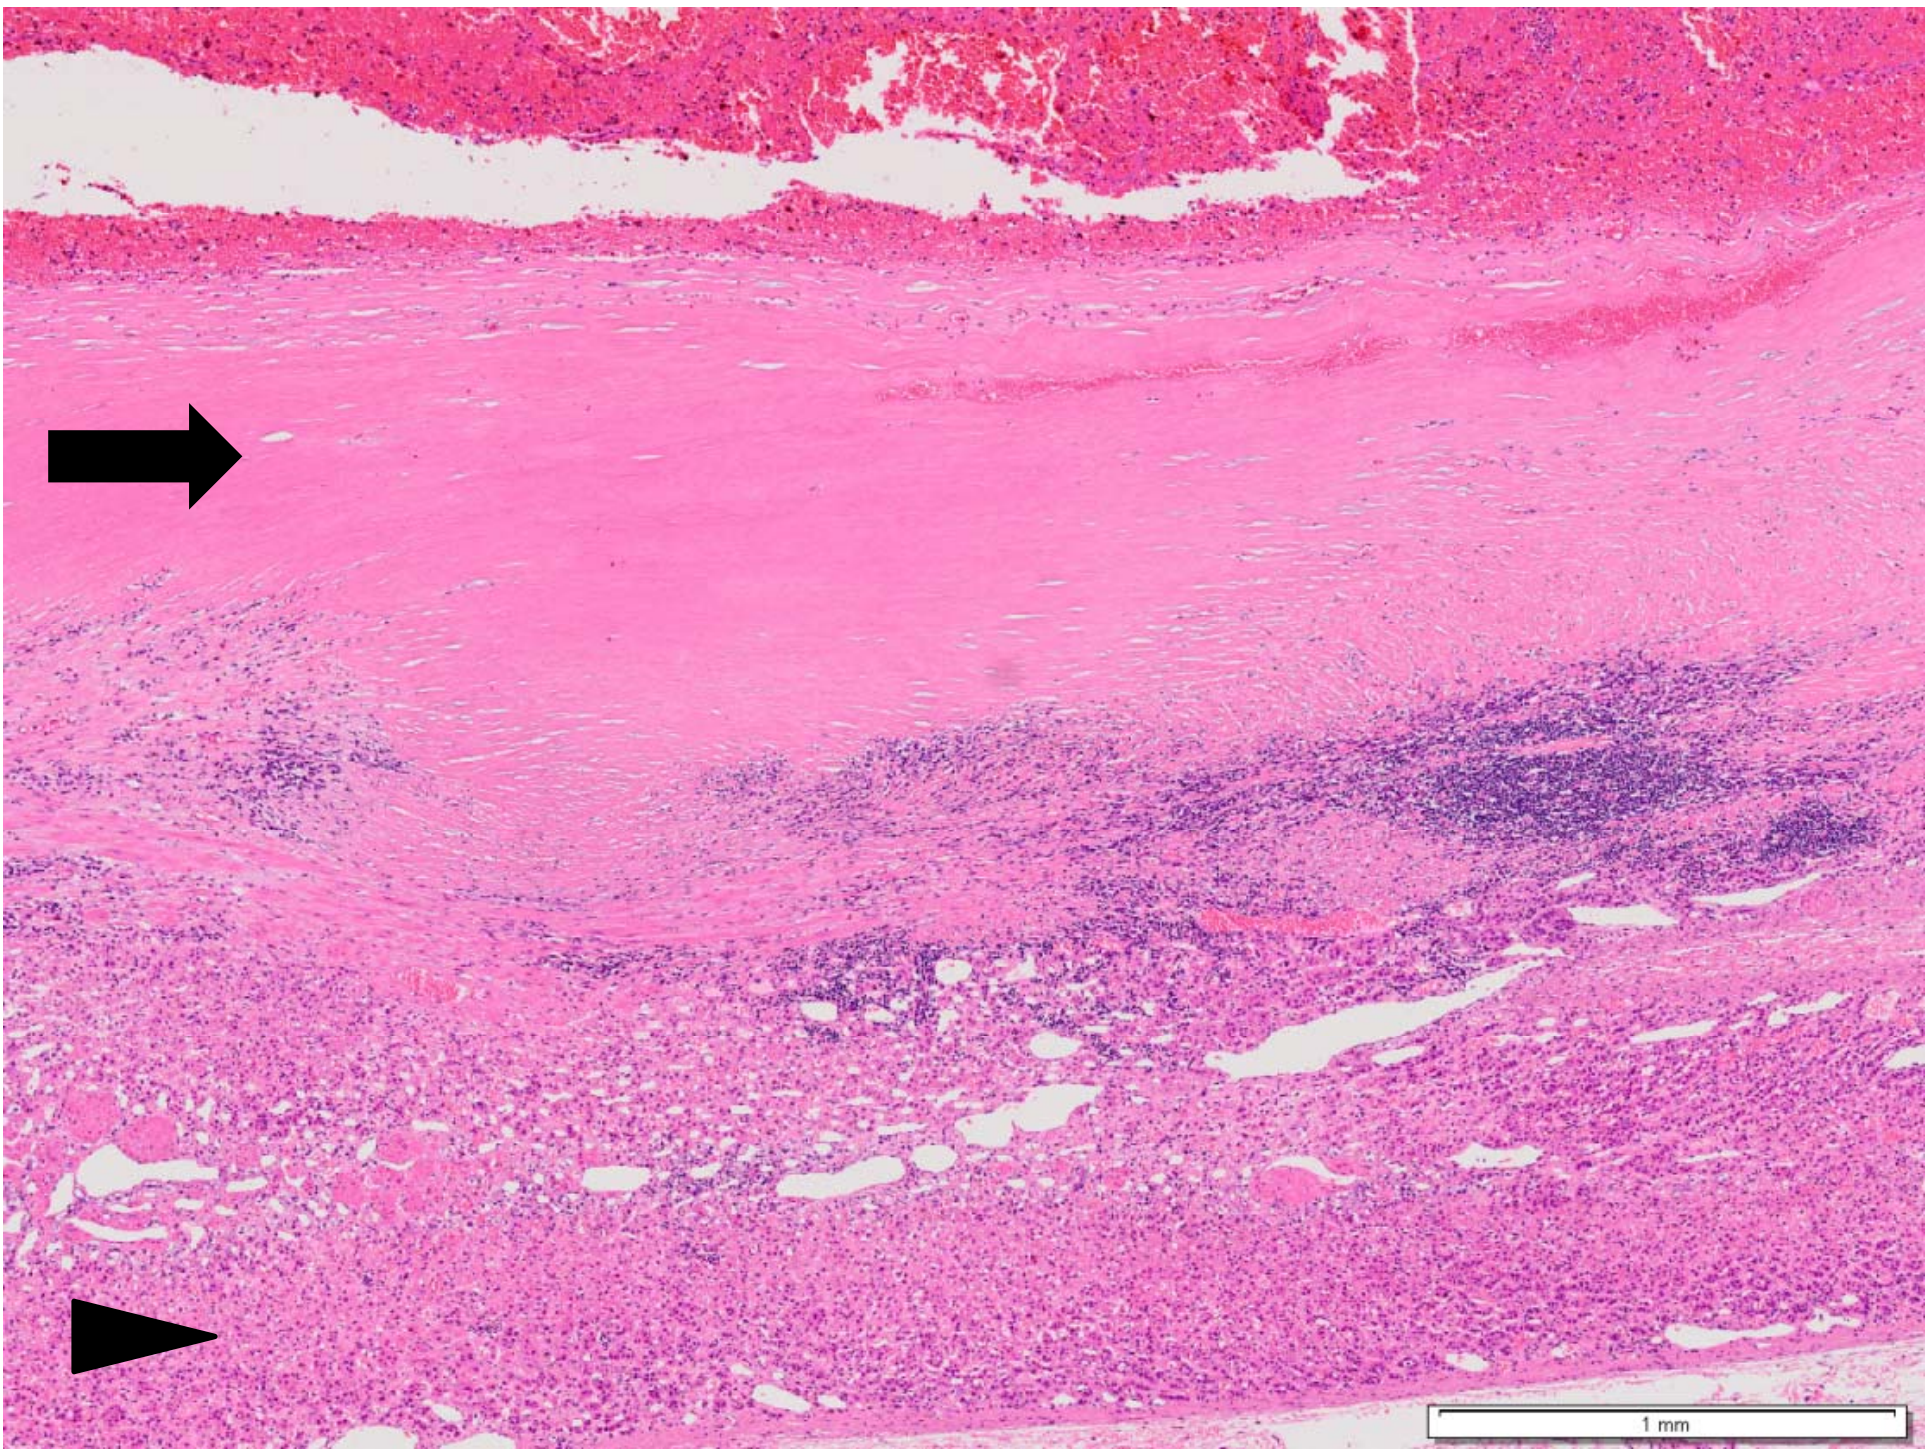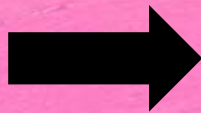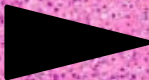

1 mm

Supplement: MOESM4 [file 9647814]
